# Supplementary material
Source: ML conference proceedings conference paper supplement (https://openreview.net/forum?id=dNyDCl2FsvM)
Supplement: supplementary_material [file attachment]

## A COMPUTATIONAL RESOURCE USAGE AND REPRODUCIBILITY REQUIREMENTS

Experiments were run on our internal GPU cluster. Running a meta-learning experiment to 30,000 iterations takes about 3 days on a NVIDIA Tesla V100 GPU. For 7 different experiment runs with 10 seeds each, the total compute time is about 210 GPU-days, though in practice the experiments can be run in parallel.

The batch size (4096) we use is quite large and does not fit in GPU memory for a consumer grade GPU. In order to achieve these batch sizes, we use gradient accumulation, so the batch size for each backward step might be 256, but then gradients are averaged over 16 steps to make an effective batch size of 4096. This trades training time for optimization stability.

## B ADDITIONAL COMPARISONS

We show additional related work comparisons and hyperparameters in Tables 4 and 5.

|               | seq2seq<br>2020   | GECA<br>2020      | FILM<br>2021     | RelNet<br>2021   | LCGN<br>2020      | Planning<br>2020  | RD Random/RL<br>2022 | Ours(o)<br>Ours |
|---------------|-------------------|-------------------|------------------|------------------|-------------------|-------------------|----------------------|-----------------|
| Learning Rate | 0.001             | 0.001             | 0.0015           | 0.0015           | 0.0001            | 0.001             |                      | 0.0001          |
| Batch Size    | 200               | 200               | 128              | 128              | 64                | 200               | 512                  | 4096            |
| Steps         | 200K              | 200K              | 115K             | 115K             | 575K              | 368K              | 13.2M                | 35K             |
| #params       |                   |                   |                  |                  |                   | 535K              |                      |                 |
| A             | 97.15 $\pm$ 0.46  | 87.6 $\pm$ 1.19   | 98.83 $\pm$ 0.32 | 97.38 $\pm$ 0.33 | 98.6 $\pm$ 0.9    | 94.19 $\pm$ 0.71  | 98.39 $\pm$ 0.17     | 0.95 $\pm$ 0.01 |
| B             | 30.05 $\pm$ 26.76 | 34.92 $\pm$ 39.30 | 94.04 $\pm$ 7.41 | 49.44 $\pm$ 8.19 | 99.08 $\pm$ 0.69  | 87.31 $\pm$ 4.38  | 62.19 $\pm$ 24.08    | 0.96 $\pm$ 0.01 |
| C             | 29.79 $\pm$ 17.70 | 78.77 $\pm$ 6.63  | 60.12 $\pm$ 8.81 | 19.92 $\pm$ 9.84 | 80.31 $\pm$ 24.51 | 81.07 $\pm$ 10.12 | 56.52 $\pm$ 29.70    | 0.97 $\pm$ 0.01 |
| D             | 0.00 $\pm$ 0.00   | 0.00 $\pm$ 0.00   | 0.00 $\pm$ 0.00  | 0.00 $\pm$ 0.00  | 0.16 $\pm$ 0.12   |                   | 43.60 $\pm$ 6.05     | 0.35 $\pm$ 0.05 |
| E             | 37.25 $\pm$ 2.85  | 33.19 $\pm$ 3.69  | 31.64 $\pm$ 1.04 | 42.17 $\pm$ 6.22 | 87.32 $\pm$ 27.38 | 52.8 $\pm$ 9.96   | 53.89 $\pm$ 5.39     | 0.85 $\pm$ 0.20 |
| F             | 94.16 $\pm$ 1.25  | 85.99 $\pm$ 0.85  | 86.45 $\pm$ 6.67 | 96.59 $\pm$ 0.94 | 99.33 $\pm$ 0.46  |                   | 95.74 $\pm$ 0.75     | 0.97 $\pm$ 0.01 |
| H             | 19.04 $\pm$ 4.08  | 11.83 $\pm$ 0.31  | 11.71 $\pm$ 2.34 | 18.26 $\pm$ 1.24 | 33.6 $\pm$ 20.81  |                   | 21.95 $\pm$ 0.03     | 0.86 $\pm$ 0.02 |

Table 4: Additional related work comparisons.

|               | ViT<br>Qiu et al., 2021 | Modular<br>Ruis & Lake, 2022 | Role-guided<br>Kuo et al., 2021 | Transformer<br>Ours | Ours(o, A)<br>Ours | Ours(o)<br>Ours |
|---------------|-------------------------|------------------------------|---------------------------------|---------------------|--------------------|-----------------|
| Learning Rate | 0.0015                  | 0.001                        | 0.001                           | 0.0001              | 0.0001             | 0.0001          |
| Batch Size    | 128                     | 200                          | 200                             | 4096                | 4096               | 4096            |
| Steps         | 114.96K                 | 73K                          | 150K                            | 35K                 | 35K                | 35K             |
| #params       | 3M                      |                              |                                 | 13.2M               | 13.2M              | 13.2M           |

Table 5: Hyperparameters used in the related work comparisons of Table 2.

## C ORACLE FUNCTION

The oracle function generates relevant instructions by the use of a templating mechanism, which replaces verbs and adverbs in the sentence with other verbs and adverbs, such that the whole combination is still in distribution, but not the same as the query instruction. The rules of the system are:

- Replace “pull” with “push” and “walk to”
- Replace “walk to” with “push” and “pull” (but not if “while spinning” is the adverb)
- Replace “push” with “walk to” and “pull” (but not if “while spinning” is the adverb)
- Replace “while zigzagging” with “hesitantly”, nothing and “while spinning” (but not if “push” is the verb)
- Replace “hesitantly” with “while zigzagging”, nothing and “while spinning” (but not if “push” is the verb)
- Replace “while spinning” with “hesitantly”, “while zigzagging” and nothing

Examples of what the oracle function generates for a given query instruction and environment can be found in Table 6.

| Environment                                                                         | Query Instruction                          | Target Actions                                                            | Supports                                                                                                                                                                                                                                                                                                                                                                                                                                                                                                                                                                                                                                                                 |
|-------------------------------------------------------------------------------------|--------------------------------------------|---------------------------------------------------------------------------|--------------------------------------------------------------------------------------------------------------------------------------------------------------------------------------------------------------------------------------------------------------------------------------------------------------------------------------------------------------------------------------------------------------------------------------------------------------------------------------------------------------------------------------------------------------------------------------------------------------------------------------------------------------------------|
| 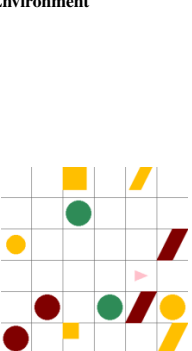  | walk to a small circle hesitantly          | LTURN(2) WALK STAY<br>WALK STAY WALK STAY<br>WALK STAY RTURN<br>WALK STAY | push a small circle hesitantly<br>LTURN LTURN WALK<br>STAY WALK STAY<br>WALK STAY WALK STAY<br>RTURN WALK STAY<br>PUSH STAY PUSH STAY<br>PUSH STAY PUSH<br>STAY<br>pull a small circle hesitantly<br>LTURN LTURN WALK<br>STAY WALK STAY<br>WALK STAY WALK STAY<br>RTURN WALK STAY<br>pull STAY pull STAY<br>pull STAY pull<br>STAY<br>walk to a small circle while spinning<br>LTURN(4) LTURN<br>LTURN WALK LTURN(4)<br>WALK LTURN(4) WALK<br>LTURN(4) WALK<br>LTURN(4) RTURN<br>WALK<br>walk to a small circle while zigzagging<br>LTURN LTURN WALK<br>RTURN WALK LTURN<br>WALK WALK WALK<br>LTURN LTURN WALK<br>walk to a small circle<br>WALK WALK WALK<br>RTURN WALK |
|  | push a red small cylinder while zigzagging | WALK RTURN WALK<br>LTURN WALK RTURN<br>WALK LTURN WALK<br>PUSH            | walk to a red small cylinder while zigzagging<br>WALK RTURN WALK<br>LTURN WALK RTURN<br>WALK LTURN WALK<br>push a red small cylinder while spinning<br>LTURN(4) WALK<br>LTURN(4) WALK<br>LTURN(4) WALK<br>LTURN(4) RTURN WALK<br>LTURN(4) WALK<br>push a red small cylinder hesitantly<br>WALK STAY WALK STAY<br>WALK STAY RTURN<br>WALK STAY WALK STAY<br>push a red small cylinder<br>WALK WALK WALK<br>RTURN WALK WALK                                                                                                                                                                                                                                                |

Table 6: Examples of what supports the oracle function generates for a given query instruction and environment state. These two examples are from the training data. Note that we never generate the same instruction as the query instruction in the supports, and we also never generate any Split H instruction in the supports. Also note that in some cases, the environment makes pushing or pulling an object impossible, even though it is in the instruction, see the second row for an example of this.
